# Supplementary material for: Identification and Analysis of Driver Missense Mutations Using Rotation Forest with Feature Selection
Source: Biomed Res Int. 2014 Aug 27;2014:905951. doi: 10.1155/2014/905951 (PMC4163459; doi:10.1155/2014/905951)
Supplement: Supplementary file 1 — The Supplementary Material S1 gives the detail score information of mRMR. The Supplementary Material S2 lists the score of each feature based DX feature selection. The Supplementary Material S3 shows the performance of predicting driver mutations using mRMR-RF and DX-RF. The Supplementary Material S4 shows the top-rank 11 features and all the 126 features. [file 905951.f1.xlsx]

## Sheet: MaxRel features
Order	Fea	Name	Score
1	107	fea107	0.114
2	126	fea126	0.106
3	125	fea125	0.106
4	104	fea104	0.062
5	97	fea97	0.06
6	86	fea86	0.038
7	79	fea79	0.035
8	81	fea81	0.032
9	83	fea83	0.03
10	101	fea101	0.03
11	93	fea93	0.025
12	71	fea71	0.024
13	73	fea73	0.024
14	76	fea76	0.022
15	96	fea96	0.021
16	89	fea89	0.02
17	24	fea24	0.019
18	74	fea74	0.018
19	87	fea87	0.018
20	42	fea42	0.018
21	25	fea25	0.018
22	109	fea109	0.017
23	70	fea70	0.016
24	56	fea56	0.016
25	39	fea39	0.015
26	65	fea65	0.014
27	44	fea44	0.014
28	1	fea1	0.014
29	28	fea28	0.014
30	68	fea68	0.013
31	32	fea32	0.013
32	29	fea29	0.013
33	47	fea47	0.012
34	88	fea88	0.012
35	91	fea91	0.012
36	2	fea2	0.012
37	58	fea58	0.012
38	34	fea34	0.012
39	38	fea38	0.012
40	62	fea62	0.011
41	35	fea35	0.011
42	23	fea23	0.011
43	90	fea90	0.011
44	55	fea55	0.011
45	18	fea18	0.01
46	64	fea64	0.01
47	26	fea26	0.01
48	94	fea94	0.01
49	19	fea19	0.01
50	110	fea110	0.01
51	52	fea52	0.01
52	36	fea36	0.01
53	54	fea54	0.01
54	37	fea37	0.009
55	50	fea50	0.009
56	72	fea72	0.009
57	8	fea8	0.009
58	30	fea30	0.009
59	41	fea41	0.009
60	11	fea11	0.009
61	20	fea20	0.009
62	61	fea61	0.008
63	22	fea22	0.008
64	75	fea75	0.008
65	69	fea69	0.007
66	66	fea66	0.007
67	57	fea57	0.007
68	16	fea16	0.007
69	27	fea27	0.007
70	4	fea4	0.007
71	7	fea7	0.007
72	100	fea100	0.007
73	17	fea17	0.007
74	67	fea67	0.006
75	3	fea3	0.006
76	92	fea92	0.006
77	46	fea46	0.006
78	59	fea59	0.006
79	45	fea45	0.006
80	21	fea21	0.006
81	78	fea78	0.006
82	51	fea51	0.005
83	84	fea84	0.005
84	9	fea9	0.005
85	60	fea60	0.005
86	80	fea80	0.005
87	48	fea48	0.005
88	85	fea85	0.005
89	31	fea31	0.004
90	108	fea108	0.004
91	53	fea53	0.004
92	5	fea5	0.004
93	63	fea63	0.004
94	40	fea40	0.004
95	82	fea82	0.003
96	95	fea95	0.003
97	77	fea77	0.003
98	121	fea121	0.002
99	43	fea43	0.002
100	14	fea14	0.002
101	102	fea102	0.002
102	15	fea15	0.002
103	12	fea12	0.002
104	119	fea119	0.002
105	122	fea122	0.002
106	106	fea106	0.002
107	116	fea116	0.002
108	6	fea6	0.002
109	118	fea118	0.002
110	111	fea111	0.002
111	33	fea33	0.001
112	112	fea112	0.001
113	49	fea49	0.001
114	115	fea115	0.001
115	113	fea113	0.001
116	105	fea105	0.001
117	10	fea10	0.001
118	120	fea120	0.001
119	117	fea117	0.001
120	13	fea13	0.001
121	98	fea98	0.001
122	123	fea123	0.001
123	103	fea103	0.001
124	114	fea114	0.001
125	99	fea99	0

## Sheet: mRMR features
Order	Fea	Name	Score
1	107	fea107	0.114
2	126	fea126	0.047
3	97	fea97	0.031
4	86	fea86	0.019
5	24	fea24	0.013
6	104	fea104	0.022
7	101	fea101	0.01
8	109	fea109	0.004
9	39	fea39	0.005
10	125	fea125	0.014
11	93	fea93	0.003
12	72	fea72	0.002
13	110	fea110	0.001
14	73	fea73	0.002
15	118	fea118	0.001
16	83	fea83	0.001
17	103	fea103	0
18	99	fea99	0
19	122	fea122	0
20	71	fea71	-0.001
21	79	fea79	0
22	4	fea4	-0.001
23	102	fea102	-0.001
24	115	fea115	-0.001
25	121	fea121	-0.002
26	76	fea76	-0.003
27	111	fea111	-0.003
28	15	fea15	-0.003
29	112	fea112	-0.003
30	105	fea105	-0.003
31	1	fea1	-0.003
32	116	fea116	-0.004
33	81	fea81	-0.004
34	100	fea100	-0.005
35	114	fea114	-0.005
36	67	fea67	-0.006
37	61	fea61	-0.006
38	108	fea108	-0.007
39	33	fea33	-0.008
40	75	fea75	-0.008
41	74	fea74	-0.008
42	27	fea27	-0.008
43	113	fea113	-0.008
44	96	fea96	-0.009
45	117	fea117	-0.011
46	85	fea85	-0.01
47	14	fea14	-0.01
48	69	fea69	-0.011
49	95	fea95	-0.011
50	34	fea34	-0.011
51	98	fea98	-0.011
52	77	fea77	-0.011
53	68	fea68	-0.011
54	70	fea70	-0.012
55	5	fea5	-0.012
56	78	fea78	-0.013
57	106	fea106	-0.013
58	119	fea119	-0.013
59	28	fea28	-0.013
60	90	fea90	-0.013
61	58	fea58	-0.015
62	94	fea94	-0.015
63	89	fea89	-0.016
64	35	fea35	-0.017
65	91	fea91	-0.017
66	120	fea120	-0.017
67	88	fea88	-0.018
68	80	fea80	-0.02
69	49	fea49	-0.02
70	87	fea87	-0.021
71	54	fea54	-0.023
72	8	fea8	-0.023
73	92	fea92	-0.023
74	82	fea82	-0.025
75	36	fea36	-0.026
76	84	fea84	-0.026
77	60	fea60	-0.027
78	19	fea19	-0.028
79	123	fea123	-0.03
80	66	fea66	-0.031
81	124	fea124	-0.033
82	42	fea42	-0.033
83	9	fea9	-0.035
84	59	fea59	-0.037
85	43	fea43	-0.039
86	10	fea10	-0.039
87	6	fea6	-0.041
88	2	fea2	-0.044
89	13	fea13	-0.046
90	44	fea44	-0.047
91	11	fea11	-0.05
92	46	fea46	-0.05
93	57	fea57	-0.053
94	63	fea63	-0.054
95	29	fea29	-0.056
96	31	fea31	-0.058
97	22	fea22	-0.06
98	37	fea37	-0.062
99	12	fea12	-0.064
100	3	fea3	-0.065
101	50	fea50	-0.068
102	23	fea23	-0.071
103	7	fea7	-0.072
104	21	fea21	-0.075
105	20	fea20	-0.076
106	51	fea51	-0.081
107	40	fea40	-0.084
108	62	fea62	-0.088
109	38	fea38	-0.09
110	25	fea25	-0.095
111	64	fea64	-0.099
112	53	fea53	-0.104
113	16	fea16	-0.107
114	17	fea17	-0.112
115	52	fea52	-0.114
116	41	fea41	-0.12
117	56	fea56	-0.124
118	45	fea45	-0.13
119	18	fea18	-0.138
120	48	fea48	-0.146
121	32	fea32	-0.15
122	47	fea47	-0.156
123	26	fea26	-0.166
124	55	fea55	-0.175
125	30	fea30	-0.182
126	65	fea65	-0.193
