# Supplementary material for: Identification and Analysis of Driver Missense Mutations Using Rotation Forest with Feature Selection
Source: Biomed Res Int. 2014 Aug 27;2014:905951. doi: 10.1155/2014/905951 (PMC4163459; doi:10.1155/2014/905951)
Supplement: Supplementary file 2 [file 905951.f2.xlsx]

## Sheet: DX
feature_index	Score
107	0.350857
125	0.311671
104	0.18469
97	0.0901797
86	0.0844346
76	0.0840011
81	0.0808999
101	0.0779267
83	0.0772633
70	0.0624197
79	0.0587742
42	0.0560065
24	0.0514845
32	0.0510006
109	0.0484718
16	0.0461565
25	0.0457422
18	0.0451975
23	0.0445572
55	0.0442623
64	0.0437133
65	0.0420308
56	0.0419529
52	0.0412118
22	0.0400676
26	0.0394089
30	0.037306
62	0.037138
31	0.0369212
47	0.0366324
95	0.0362449
58	0.0350581
71	0.0319612
54	0.0316866
89	0.0312054
38	0.0292855
50	0.0270576
110	0.0267666
39	0.026703
34	0.0264064
87	0.0261191
66	0.0256912
73	0.0255534
60	0.0245651
82	0.0241493
28	0.024075
29	0.0238104
20	0.0211925
45	0.0211491
35	0.0210709
100	0.019634
19	0.0181109
46	0.0180438
53	0.0170499
93	0.0168986
44	0.0165673
91	0.016026
74	0.0157288
59	0.0154351
96	0.0147898
72	0.0141226
68	0.0137905
90	0.0122432
48	0.0115043
57	0.0111955
108	0.0109827
51	0.0108765
80	0.010737
9	0.0106623
21	0.0104713
3	0.00919641
41	0.0091897
2	0.00877504
126	0.00822771
49	0.00770932
1	0.00752497
40	0.00666491
102	0.00645579
14	0.00582754
33	0.00562479
8	0.00535045
106	0.00524046
17	0.00515907
43	0.00513152
111	0.00462532
67	0.00426061
84	0.00416983
116	0.00380157
88	0.0035775
61	0.00324294
105	0.00320448
4	0.0029098
7	0.0029098
75	0.00251316
119	0.00249624
5	0.00244876
120	0.00219291
78	0.00200238
117	0.00197955
98	0.00196077
10	0.00182536
122	0.00180257
85	0.00151814
103	0.0011936
115	0.00115065
6	0.00108401
37	0.000878575
112	0.000846299
123	0.000808842
36	0.000689508
69	0.000575724
99	0.000557903
12	0.000432556
113	0.000394941
121	0.000350426
94	0.000277532
92	0.000232681
118	0.000154335
63	0.000147632
124	0.000138601
77	0.00011959
15	0.000105664
11	0.000100624
27	7.98e-06
114	2.71e-06
13	1.02e-06
