# Supplementary material for: Identification and Analysis of Driver Missense Mutations Using Rotation Forest with Feature Selection
Source: Biomed Res Int. 2014 Aug 27;2014:905951. doi: 10.1155/2014/905951 (PMC4163459; doi:10.1155/2014/905951)
Supplement: Supplementary file 4 [file 905951.f4.xlsx]

## Sheet: the top-ranked 11 features
Index	the top-ranked 11 Features based on DX-RF
107	mutagenic sites (MUTAGEN)
125	count of missense changes at or close to the mutated position from SwissProt variant pages
104	modified residues (MOD_RES)
97	LCC (Linear Correlation Coefficient)
86	Protein sequence-specific features: FM
76	Protein sequence-specific features:WQ
81	Protein sequence-specific features:VM
101	phosphate
83	Protein sequence-specific features:MQ
70	Protein sequence-specific features: CW
79	Protein sequence-specific features:NH

## Sheet: All features
Index	All Features(Please look at Tan et al.'s paper with title "A novel missense-mutation-related feature extraction scheme for 'driver' mutation identification,Bioinformatics,2012")
1	change in mass
2	change in surface
3	change in volume
4	change in acidicity
5	change in polarity
6	change in hydrophobicity
7	charge
8	change of C
9	change of H atoms
10	change of N atoms
11	change of O atoms
12	the probability of the wild type residue being buried
13	the probability of the wild type residue being intermediate
14	the probability of the wild type residue being exposed
15	relative position of mutation occurrence in the involved protein (pos/length)
16	BLOSUM62 substitution matrix
17	Base-substitution-protein-stability matrix
18	Substitution matrix (VTML160) obtained by maximum likelihood estimation
19	The 250 PAM transmembrane protein exchange matrix
20	Residue replace ability matrix
21	Substitution matrix derived from structural alignments by maximizing entropy
22	Grantham Score
23	The PAM-120 matrix
24	Log-odds scoring matrix collected in 6.4-8.7 PAM
25	Log-odds scoring matrix collected in 22-29 PAM
26	Log-odds scoring matrix collected in 74-100 PAM
27	Genetic code matrix
28	Structure-Genetic matrix
29	Hydrophobicity scoring matrix
30	The mutation matrix for initially aligning
31	BLOSUM45 substitution matrix
32	BLOSUM80 substitution matrix
33	Conformational similarity weight matrix
34	The secondary structure similarity matrix
35	EMPAR matrix
36	Structure-derived correlation matrix
37	Structure-derived correlation matrix 2
38	STR matrix from structure-based alignments
39	Scoring matrix
40	The single residue substitution matrix
41	The substitution matrix derived from spatially conserved motifs
42	WAC matrix constructed from amino acid comparative profiles
43	Difference matrix obtained by subtracting the BLOSUM62 from the WAC
44	Matrix built from structural superposition data for identifying potential remote homologues
45	Structure derived matrix (SDM) for alignment of distantly related sequences
46	Homologous structure derived matrix (HSDM) for alignment of distantly related sequences
47	STROMA score matrix for the alignment of known distant homologues
48	Substitution matrix derived from the single residue interchanges at spatially conserved regions of proteins
49	Substitution matrix based on structural alignments of analogous proteins
50	Substitution matrix based on structural alignments of remote homologous proteins
51	Substitution matrix based on structural alignments of analogous and remote homologous proteins
52	Substitution matrix (OPTIMA) derived by maximizing discrimination between homologues and non-homologues
53	Substitution matrix (PHAT) built from hydrophobic and transmembrane regions of the blocks databases
54	Non-symmetric substitution matrix (SLIM) for detection of homologous transmembrane proteins
55	Substitution matrix (VTML250) obtained by maximum likelihood estimation
56	Substitution matrix computed from the Dirichlet Mixture Model (DMM)
57	Substitution probability table for alpha residues
58	Substitution probability table for beta residues
59	Substitution table for accessible residue
60	Substitution table for inaccessible residue
61	Amino acid similarity matrix based on the sausage force field
62	An amino acid similarity matrix based on the THREADER force field
63	Residue substitutions matrix from thermo/mesophilic to psychrophilic enzymes
64	Log odds matrix for 40 PAMs
65	BLOSUM50 substitution matrix
66	EX substitution score
67	WM
68	MW
69	WW
70	CW
71	YM
72	HM
73	CM
74	DW
75	MM
76	WQ
77	IM
78	NH
79	WY
80	MD
81	VM
82	IW
83	MQ
84	HN
85	RM
86	FM
87	MR
88	WC
89	MN
90	NW
91	DM
92	TM
93	VW
94	HD
95	DH
96	HR
97	LCC (Linear Correlation Coefficient)
98	Metal-binding
99	Carbohydrate
100	DNA-binding
101	phosphate
102	Calcium
103	disulfide
104	modified residues (MOD_RES)
105	propeptide (PROPEP)
106	signal peptide (Signal, SIGNAL)
107	mutagenic sites (MUTAGEN)
108	transmembrane regions (Transmembrane)
109	repeat regions (Repeat, REPEAT)
110	known motifs(MOTIF)
111	known zinc fingers(Zinc)
112	probability of seeing the wildtype residue in the first position of an amino acid triple in UniProtKB
113	probability of seeing the wildtype residue in the middle position of an amino acid triple in UniProtKB
114	probability of seeing the wildtype residue in the last position of an amino acid triple in UniProtKB
115	probability of seeing the mutant residue in the first position of an amino acid triple in UniProtKB
116	probability of seeing the mutant residue in the middle position of an amino acid triple in UniProtKB
117	probability of seeing the mutant residue in the last position of an amino acid triple in UniProtKB
118	difference in probability of seeing the wildtype vs. the mutant residue in the first position of an amino acid triple in UniProtKB
119	difference in probability of seeing the wildtype vs. the mutant residue in the middle position of an amino acid triple in UniProtKB
120	difference in probability of seeing the wildtype vs. the mutant residue in the last position of an amino acid triple in UniProtKB
121	probability of seeing the wildtype at the center of a window of amino acid quintuples in UniProtKB
122	probability of seeing the mutant at the center of a window of amino acid quintuples in UniProtKB
123	background probability of wildtype residue in UniProtKB human proteins
124	background probability of mutant residue in UniProtKB human proteins
125	count of missense changes at or close to the mutated position from SwissProt variant pages
126	frequency of missense change type in the Catalogue of Somatic Mutations in Cancer (COSMIC) database
